# Supplementary material for: Development and Characterization of Pullulan-Based Orodispersible Films of Iron
Source: MDPI journal article supplement (doi:10.3390/pharmaceutics15031027), 2023-03-22
Supplement: s1 [file s1]

# Supplementary Materials: Development and Characterization of Pullulan-Based Orodispersible Films of Iron

Maram Suresh Gupta, Tegginamath Pramod Kumar, Dinesh Reddy, Kamla Pathak, Devegowda Vishakante Gowda, A.V. Naresh Babu, Alhussain H. Aodah, El-Sayed Khafagy, Hadil Faris Alotaibi, Amr Selim Abu Lila, Afrasim Moin, Talib Hussin

## Supplementary Information:

**Table S1.** Composition for simulated salivary fluid (SSF; pH 6.8).

| Ingredients                    | Quantity      |
|--------------------------------|---------------|
| Disodium hydrogen phosphate    | 2.382 g       |
| Potassium dihydrogen phosphate | 0.19 g        |
| Sodium chloride                | 8.00 g        |
| Distilled water                | Up to 1000 mL |
| Phosphoric acid                | Q.S to pH 6.8 |

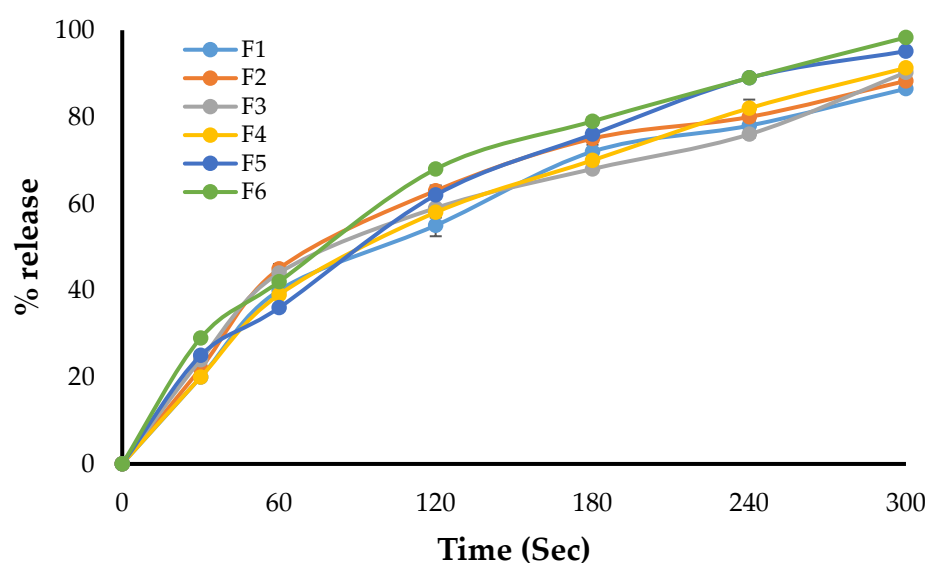

**Figure S1.** : Dissolution rate of pullulan-based i-ODFs.
